# Supplementary material
Source: publisher site journal article supplement (https://www.spandidos-publications.com/5102/downloadSupplementary)
Supplement: Supplementary file 1 [file downloadSupplementary]

## Sheet: Table S5
Table SV. Univariate Cox expression analysis of DNASE1L1.
Cancer	HR	HR.95L	HR.95H	P-value
ACC	0.496286	0.306302	0.804108	0.00443498
BLCA	1.09239	0.828197	1.44086	0.531603
BRCA	1.177	0.807443	1.7157	0.396672
CESC	1.18887	0.826479	1.71017	0.351022
CHOL	0.80006	0.370895	1.72581	0.569551
COAD	1.42505	0.959739	2.11596	0.0790521
DLBC	4.47635	0.87273	22.9598	0.0723718
ESCA	1.30308	0.731791	2.32035	0.368518
GBM	1.46397	1.04284	2.05517	0.0276423
HNSC	1.48967	1.18255	1.87654	0.000716031
KICH	1.03639	0.241545	4.44685	0.961632
KIRC	0.748112	0.50482	1.10865	0.148175
KIRP	0.89012	0.425957	1.86008	0.756909
LAML	2.82545	1.79188	4.4552	7.81336e-06
LGG	3.86347	2.37894	6.27438	4.68407e-08
LIHC	1.14257	0.862959	1.51278	0.351997
LUAD	1.24535	0.926627	1.67371	0.145742
LUSC	1.27833	0.989901	1.65079	0.0598141
MESO	0.683612	0.421456	1.10883	0.123236
OV	0.938213	0.734153	1.19899	0.610278
PAAD	1.1888	0.759646	1.86039	0.449129
PCPG	0.506353	0.143583	1.78568	0.28992
PRAD	1.50694	0.342599	6.62839	0.587401
READ	1.18643	0.554824	2.53703	0.659342
SARC	0.633306	0.459785	0.872314	0.00517152
SKCM	0.908549	0.719836	1.14674	0.419462
STAD	0.837666	0.609816	1.15065	0.274124
TGCT	2.25342	0.401291	12.6539	0.356093
THCA	0.681774	0.215139	2.16054	0.5151
THYM	3.28097	1.2616	8.53261	0.0148297
UCEC	1.10336	0.733784	1.65908	0.636479
UCS	1.48812	0.587593	3.76879	0.401779
UVM	2.57399	0.98282	6.74124	0.0542686
